## Real-world effectiveness and the safety of anticoagulant treatment in elderly non-valvular atrial fibrillation in the ANAFIE registry, the largest real-world elderly AF registry

T. Yamashita<sup>1</sup>, H. Inoue<sup>2</sup>

<sup>1</sup>The Cardiovascular Research Institute, Tokyo, Japan; <sup>2</sup>Saiseikai Toyama Hospital, Toyama, Japan

On behalf of ANAFIE registry

**Funding Acknowledgement:** Type of funding source: Private company. Main funding source(s): Daiichi Sankyo Co., Ltd.

**Background:** The optimal anticoagulant regimen for elderly AF has not been well elucidated, because this population, especially the very elderly ( $\geq 85$  years), have not been sufficiently represented in most randomized controlled clinical trials for stroke prevention in non-valvular AF (NVAF).

**Purpose:** The ANAFIE registry was designed to evaluate the real-world anticoagulant treatment status of elderly ( $\geq 75$  years) NVAF patients including  $>8,000$  very elderly patients. In this main analysis of the ANAFIE, the incidence of stroke or systemic embolic events (stroke/SEE), and major bleeding were compared between warfarin (WF) and direct oral anticoagulants (DOACs).

**Methods:** A total of 33,018 NVAF patients aged  $\geq 75$  years was enrolled in the ANAFIE, and followed for 2 years. The incidence of stroke/SEE and major bleeding by type of anticoagulants (WF and all DOACs) was estimated using Kaplan-Meier method. Hazard ratio (HR) and 95% confidence interval (95% CI) were calculated by Cox proportional hazard model.

**Results:** In the analysis set of 32,099 patients, the mean age was 81.5

years. 23,738 (74%) were  $<85$  years and 8,361 (26.0%) were  $\geq 85$  years. 92.5% of the whole population used anticoagulants including WF (27.6%) or DOACs (72.3%). The ratio of each DOAC was dabigatran 7.8%, rivaroxaban 21.5%, apixaban 26.9% and edoxaban 16.1%. Stroke/SEE and major bleeding was observed in 396 patients (1.24/100 patient-years [py]) and 279 patients (0.87/100py). The time in therapeutic range for patients  $<85$  years and  $\geq 85$  years in the WF group was 76.7% and 72.2%, respectively. The incidence of stroke/SEE was numerically lower in patients taking any DOAC vs. WF regardless of age group ( $<85$  years [HR 0.83] and  $\geq 85$  years [HR 0.71]). Major bleeding was also lower vs. WF in both age groups ( $<85$  years [HR 0.60] and  $\geq 85$  years [HR 0.65]).

**Conclusion:** In elderly NVAF patients enrolled in the ANAFIE registry, the incidence of stroke/SEE and major bleeding was lower in patients taking a DOAC compared with WF for all patients  $\geq 75$  years, even for very elderly patients.

|                       |                 | WF          |                      | DOACs        |                      | HR (95% CI) vs WF |
|-----------------------|-----------------|-------------|----------------------|--------------|----------------------|-------------------|
|                       |                 | Event n / n | Event rate (/100 py) | Event n / n  | Event Rate (/100 py) |                   |
| Stroke/SEE            | Total           | 118 / 7,975 | 1.45                 | 239 / 20,960 | 1.12                 | 0.77 (0.62, 0.96) |
|                       | $<85$ years     | 72 / 5,683  | 1.25                 | 168 / 15,950 | 1.04                 | 0.83 (0.63, 1.10) |
|                       | $\geq 85$ years | 46 / 2,292  | 1.96                 | 71 / 5,010   | 1.39                 | 0.71 (0.49, 1.03) |
| Major Bleeding (ISTH) | Total           | 100 / 7,993 | 1.23                 | 159 / 21,036 | 0.75                 | 0.61 (0.47, 0.78) |
|                       | $<85$ years     | 67 / 5,685  | 1.16                 | 112 / 16,005 | 0.69                 | 0.60 (0.44, 0.81) |
|                       | $\geq 85$ years | 33 / 2,308  | 1.41                 | 47 / 5,031   | 0.92                 | 0.65 (0.42, 1.02) |
